# Supplementary material for: Transcriptome analysis of thermogenic Arum concinnatum reveals the molecular components of floral scent production
Source: PubMed Central journal article supplement (PMC5390080; doi:10.1038/srep08753), 2015-03-04
Supplement: srep08753-s5.pdf [file srep08753-s5.pdf]

Supplementary Information File

**Title: Transcriptome analysis of thermogenic *Arum concinatum* reveals the molecular components of floral scent production**

Yoshihiko Onda<sup>1,2</sup>, Keiichi Mochida<sup>1,2,3</sup>, Takuhiro Yoshida<sup>4</sup>, Tetsuya Sakurai<sup>4</sup>, Roger Seymour<sup>5</sup>, Yui Umekawa<sup>6</sup>, Stergios Arg. Pirintsos<sup>7</sup>, Kazuo Shinozaki<sup>1,3</sup>, Kikukatsu Ito<sup>8</sup>

<sup>1</sup>Biomass Research Platform Team, Biomass Engineering Program Cooperation Division, RIKEN Center for Sustainable Resource Science, Kanagawa, Japan

<sup>2</sup>Kihara Institute for Biological Research, Yokohama City University, Kanagawa, Japan

<sup>3</sup>Gene Discovery Research Group, RIKEN Center for Sustainable Resource Science, Kanagawa, Japan

<sup>4</sup>Integrated Genome Informatics Research Unit, RIKEN Center for Sustainable Resource Science, Kanagawa, Japan

<sup>5</sup>School of Biological Sciences, University of Adelaide, Australia

<sup>6</sup>United Graduate School of Agricultural Science, Iwate University, Morioka, Japan

<sup>7</sup>Department of Biology, University of Crete, Heraklion, Greece

<sup>8</sup>Cryobiofrontier Research Center, Iwate University, Morioka, Japan

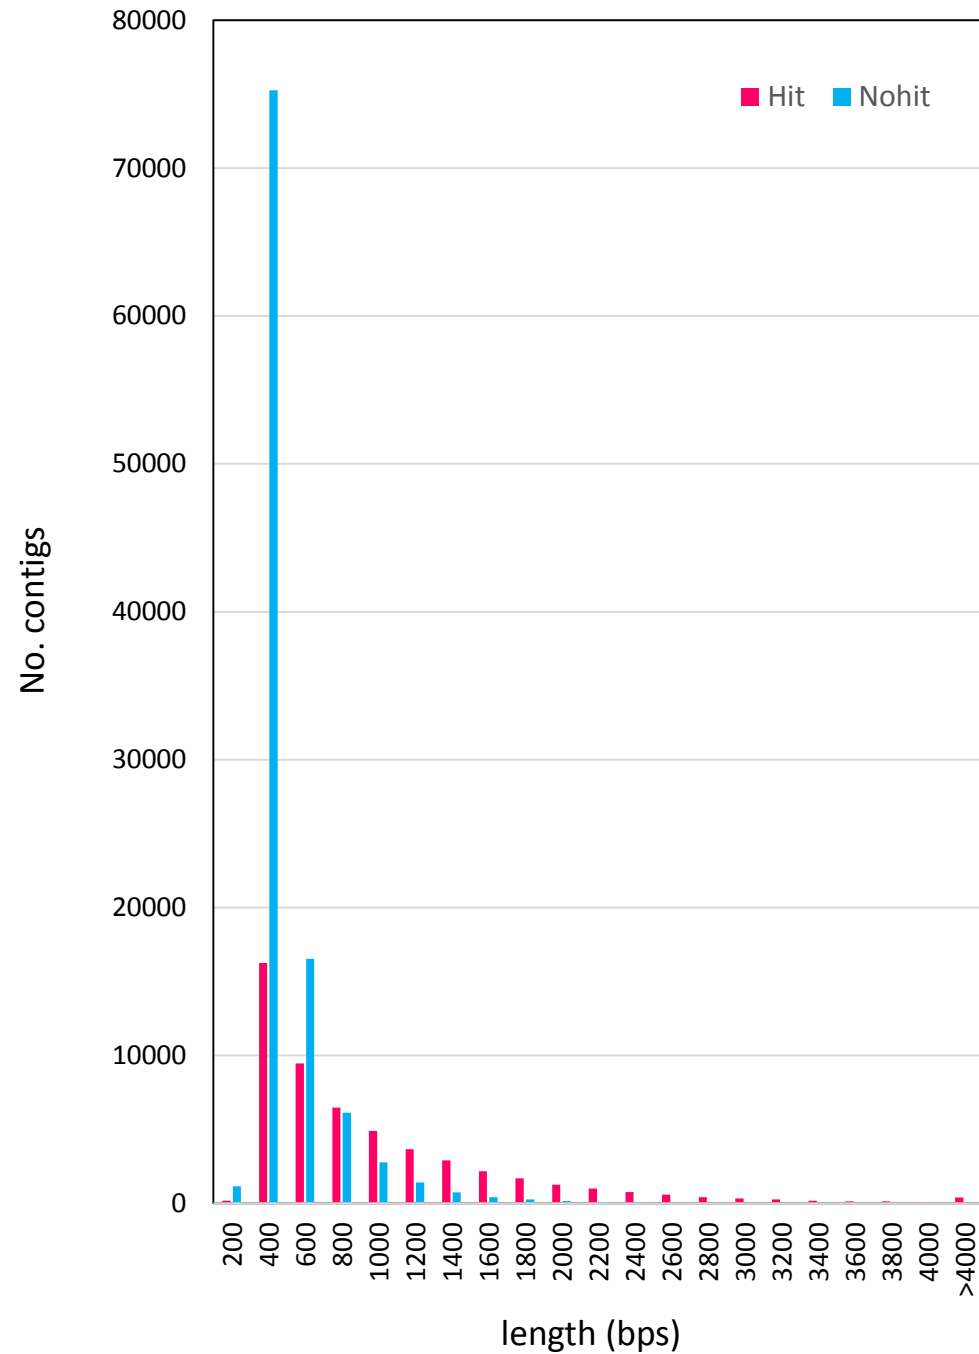

**Supplementary Figure S1.** Length distribution of assembled transcripts (contigs).

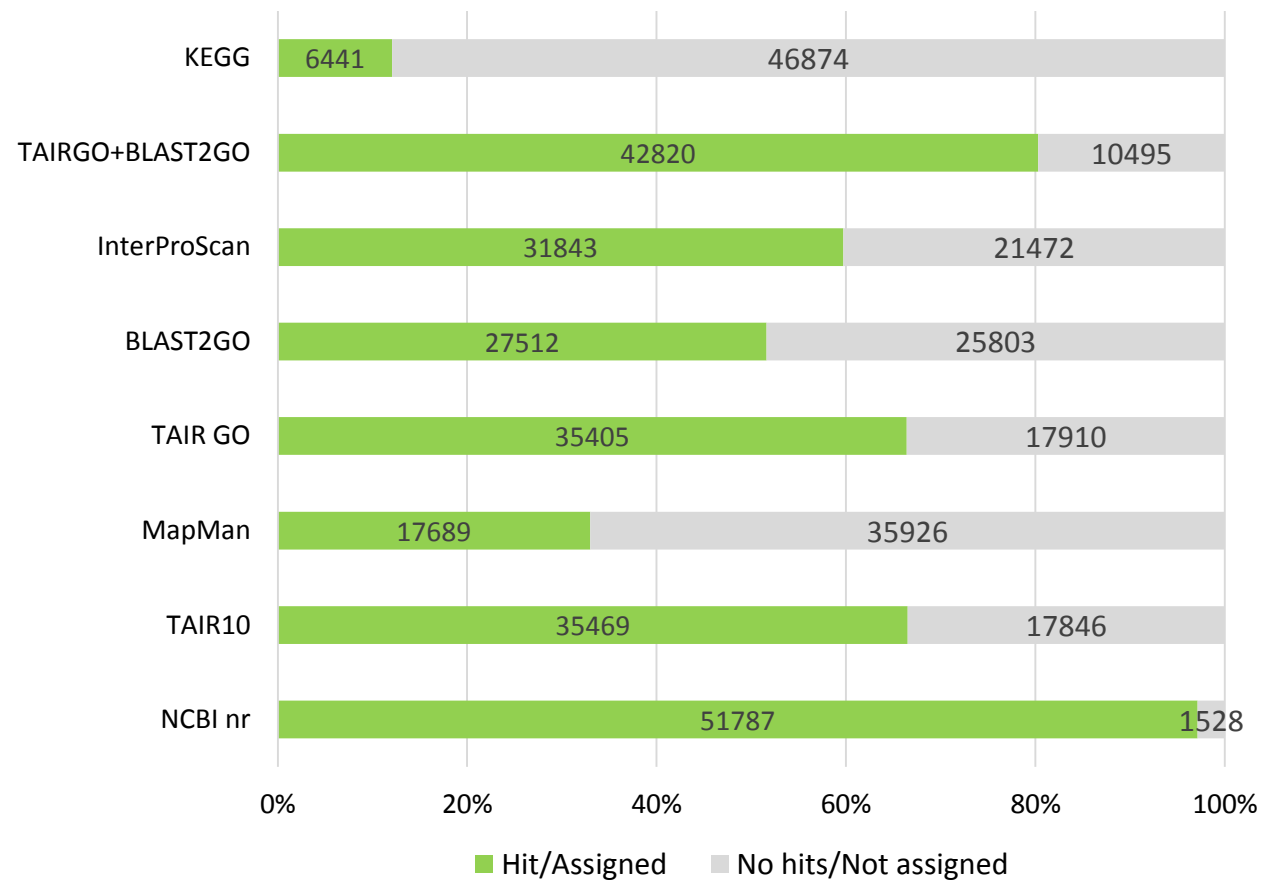

**Supplementary Figure S2.** Status of functional predication of gene models with various information resources.
